# Supplementary material
Source: PubMed Central journal article supplement (PMC5159254)
Supplement: NIHMS804843-supplement-1.pdf [file NIHMS804843-supplement-1.pdf]

**Table S1. Related to Figure 4****Statistics for EL\_REC solution structure determination**

---

|                                                   |               |
|---------------------------------------------------|---------------|
| <b>Experimental restraints</b>                    |               |
| NOE Unambiguous restraints                        | 2009          |
| NOE Ambiguous restraints                          | 710           |
| Dihedral angle restraints                         | 195           |
| Hydrogen bond restraints                          | 106           |
| <b>Mean rmsd from experimental restraints</b>     |               |
| NOE, Å                                            | 0.03 ±0.001   |
| Dihedral angles, °                                | 0.2 ±0.06     |
| Hydrogen bonds, Å                                 | 0.02 ±0.002   |
| <b>Average number of</b>                          |               |
| NOE violations > 0.5 Å                            | 0             |
| NOE violations > 0.3 Å                            | 1.1 ±0.8      |
| Dihedral violations > 5°                          | 0             |
| Hydrogen bond violations > 0.1 Å                  | 0             |
| <b>Mean rmsd from idealized covalent geometry</b> |               |
| Bond lengths, Å                                   | 0.004 ±0.0001 |
| Bond angles, °                                    | 0.49 ±0.01    |
| Impropers, °                                      | 1.3 ±0.05     |
| <b>Geometric analysis of residues 144-257</b>     |               |
| Rmsd from the mean                                |               |
| Backbone atoms, Å                                 | 0.7 ±0.2      |
| All heavy atoms, Å                                | 1.3 ±0.2      |
| <b>Ramachandran analysis (PROCHECK)</b>           |               |
| Most-favored regions, %                           | 89.2 ±1.3     |
| Allowed regions, %                                | 9.8 ±1.6      |
| Generously allowed regions, %                     | 0.9 ±0.7      |
| Disallowed regions, %                             | 0.1 ±0.3      |

---

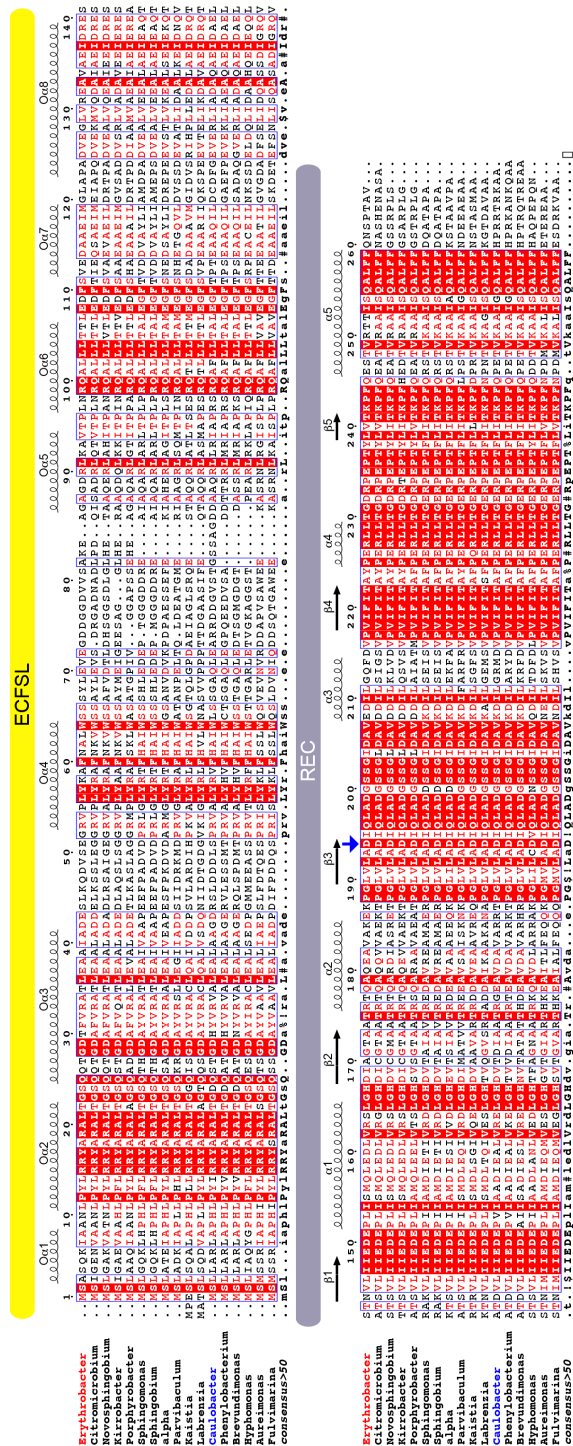

Figure S1. Related to Figure 1.

Sequence alignment of PhyR homologues, including *Erythrobacter litoralis* (red) and *Caulobacter crescentus* (blue). A blue arrow indicates the highly conserved phosphoacceptor aspartate. Other features indicated include the locations of the predicted secondary structures (subsequently confirmed by our structural studies), along with domain boundaries for the extracytoplasmic function sigma like domain (ECFSL, yellow) and receiver domain (REC, grey). Sequence alignment was performed using the program Multalin (<http://multalin.toulouse.inra.fr/multalin>) based on (Corpet, 1988).

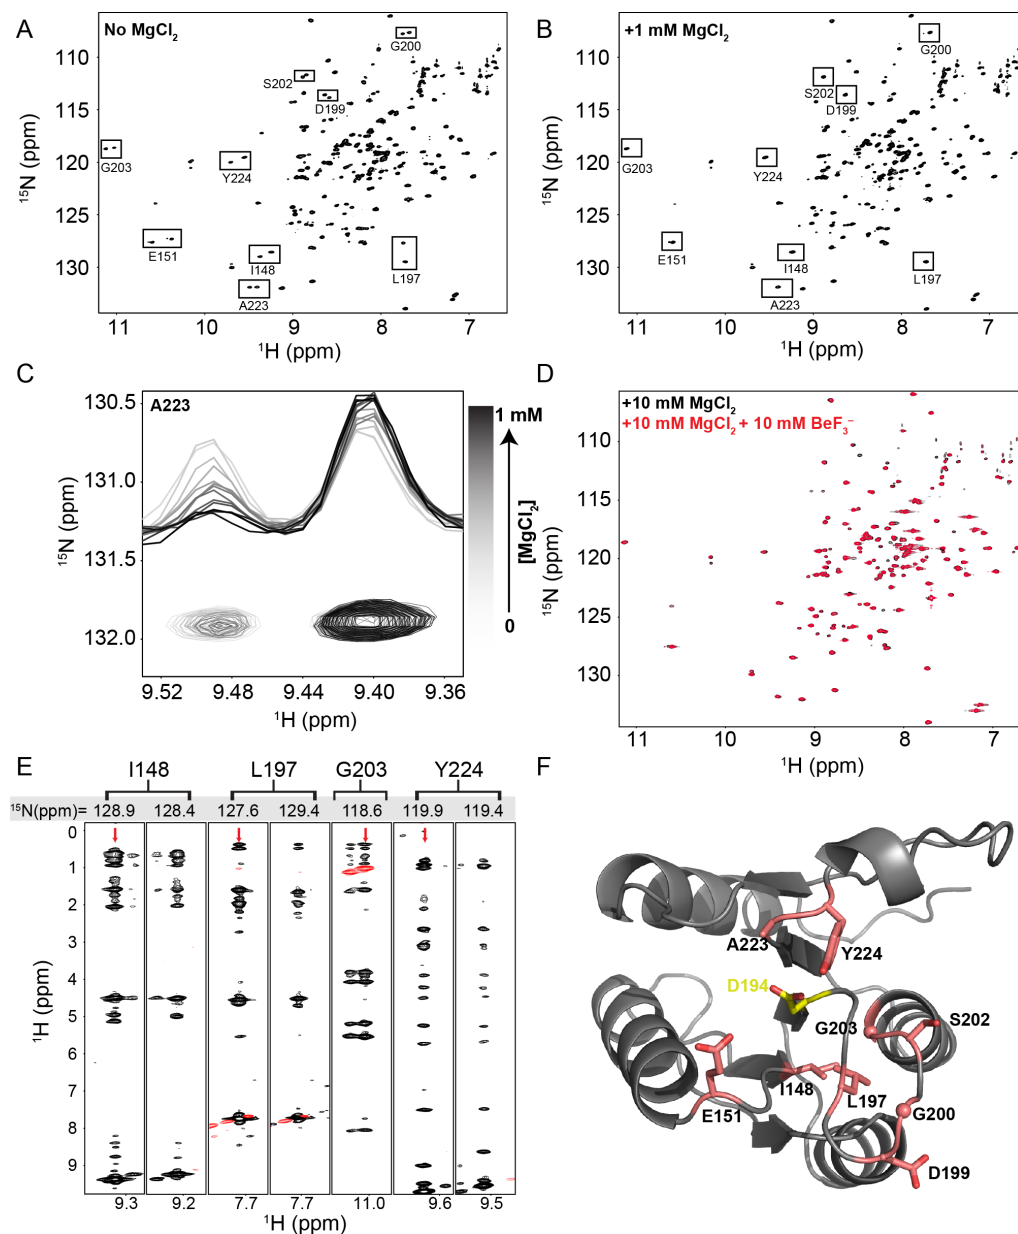

**Figure S2. Related to Figures 2, 3 and 4**

Binding of  $\text{Mg}^{2+}$  ions to EL\_REC stabilizes a single protein conformation. (A) Removal of the ECFSL allows the REC domain to slowly interconvert between two conformations, as indicated by the appearance of multiple cross-peaks for several residues. Most of these resonances arise from residues associated with  $\text{Mg}^{2+}$  binding or adjacent to the metal binding site. Square boxes highlight examples of several cross-peaks showing such conformational exchange. (B) Addition of  $\text{MgCl}_2$  reduced the number of doubled cross-peaks, demonstrating that divalent cation binding stabilizes one of the conformations. (C) As demonstrated by the A223 amide signal, titration with  $\text{MgCl}_2$  changes the equilibrium between the two conformations, showing classic NMR slow exchange behavior. (D) Addition of  $\text{BeF}_3^-$  to  $\text{Mg}^{2+}$ -loaded EL\_REC protein shows minor changes, consistent with the protein being in an active conformation. (E) Strips from  $^{15}\text{N}$ -edited NOESY spectra show similar patterns of cross-peaks for both conformers, suggesting minimal structural differences between the two conformations. Red arrows indicate cross-peaks for dominant conformation (65% of sample); note that red peaks for G203 arise from spectral aliasing. (F) Residues undergoing this slow interconversion phenomenon (pink) map to a common regions on the EL\_REC NMR structure, localized in loops near the active site (phosphoacceptor D194, yellow).

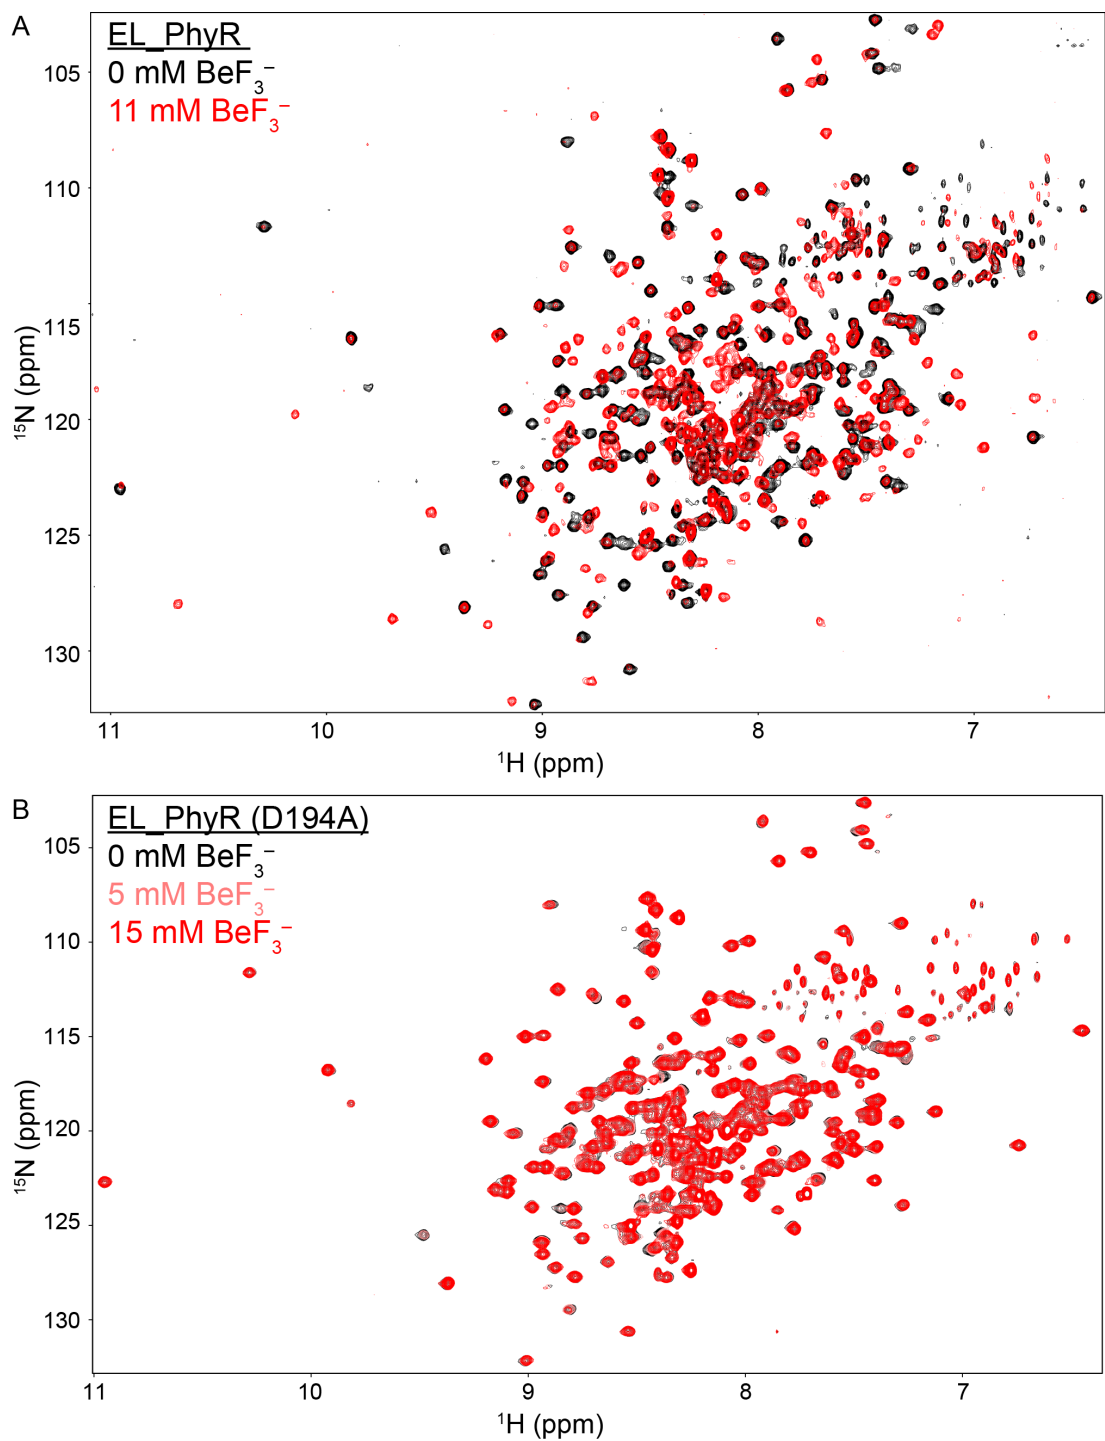

**Figure S3. Related to Figures 2, 3, 5 and 7.**

Mutation of the D194 phosphoacceptor residue disrupts  $\text{BeF}_3^-$  binding. (A)  $^{15}\text{N}$ - $^1\text{H}$  HSQC spectra of EL\_PhyR in the presence and absence of  $\text{BeF}_3^-$  show extensive differences, indicating that  $\text{BeF}_3^-$  binding leads to marked changes on protein conformation. (B) In contrast, we observe very minor changes when  $\text{BeF}_3^-$  is added to EL\_PhyR (D194A), confirming the critical role of this residue for phosphomimic binding. Buffer conditions: 20 mM HEPES (pH 7), 50 mM NaCl, 5 mM  $\text{MgCl}_2$ .

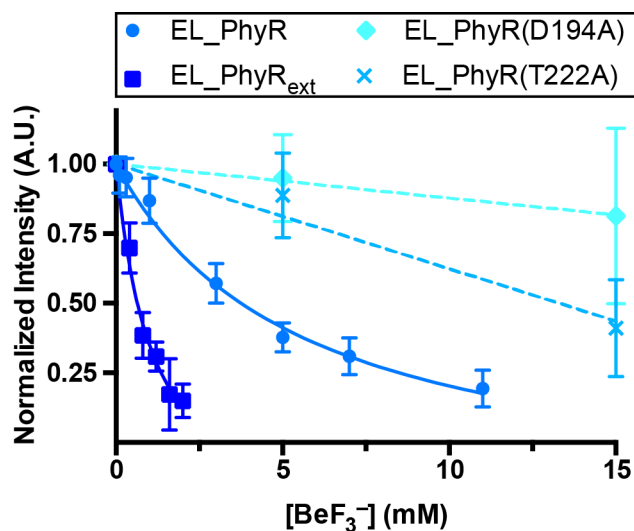

**Figure S4. Related to Figures 2, 3, 5 and 7**

EL\_PhyR affinity for BeF<sub>3</sub><sup>-</sup> can be modulated by mutations at or near the phosphoacceptor site, along with changes to the ECFSL-REC interdomain linker. Titration curves of EL\_PhyR variants with BeF<sub>3</sub><sup>-</sup> were obtained by monitoring changes in peak intensity in <sup>15</sup>N-<sup>1</sup>H TROSY spectra; in each spectrum, normalized intensities of nine or ten probes were measured and averaged (error bars at ± one S.D.) for this analysis. Lines shown for EL\_PhyR and EL\_PhyR<sub>ext</sub> data correspond to fits to single site binding equations; dashed lines (D194A, T222A) are not fits and are included only for illustrative purposes. From these data, we see that extension of the interdomain linker by seven residues substantially increases BeF<sub>3</sub><sup>-</sup> affinity consistent with biasing the REC domain into an active conformation ( $K_d$ : 1.0 mM for EL\_PhyR<sub>ext</sub> vs. 5.5 mM for EL\_PhyR). In contrast, D194A (diamond) and T222A (crosses) mutations reduce BeF<sub>3</sub><sup>-</sup> binding affinity markedly. Buffer conditions: 20 mM HEPES pH 7, 50 mM NaCl, 5 mM MgCl<sub>2</sub>.

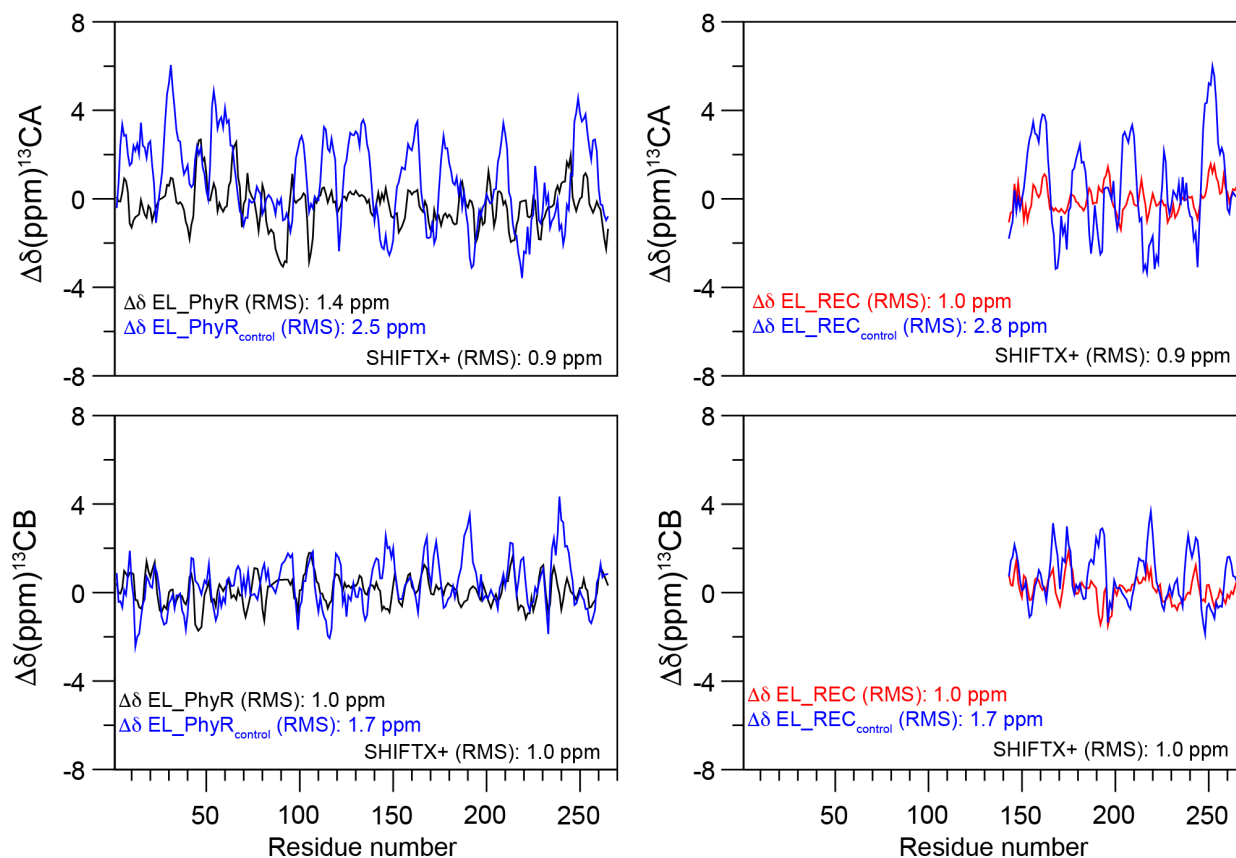

**Figure S5. Related to Figure 4.**

Chemical-shift based validation of the EL\_PhyR homology model. Comparisons of experimental and calculated  $^{13}\text{CA}$  and  $^{13}\text{CB}$  chemical shifts were obtained by subtracting our experimental shifts from theoretical chemical shift assignments calculated by the program SHIFTX2 (Han et al., 2011):

$$\Delta\delta (\text{ppm}) = \delta(\text{SHIFTX2 calculated}) - \delta(\text{experimental})$$

$\Delta\delta$  values were calculated using the theoretical shifts of either our full-length protein homology model (EL\_PhyR) or a representative member of the EL\_REC NMR ensemble. To validate this approach, we also generated a pair of negative control data (EL\_PhyR<sub>control</sub>, EL\_REC<sub>control</sub>), which used SHIFTX2-based chemical shifts generated from artificially-extended versions of EL\_PhyR and EL\_REC proteins instead of the native structures. These negative controls should provide a calibration of  $\Delta\delta$  values that would be obtained from highly incorrect structures.

Once calculated, we obtained RMS  $\Delta\delta$  values prior to processing these parameters with a three-residue running average and plotting. Values approaching 0 indicate a better agreement between chemical shifts calculated by SHIFTX2 and experimentally-determined values.

These analyses reveal comparable RMS values among those generated from the EL\_PhyR homology model, the experimentally-determined EL\_REC structure, and the program's test set of 61 high-resolution X-ray structures (Han et al., 2011), providing independent verification of the quality of the EL\_PhyR and EL\_REC structures. Additionally, the substantial differences between  $\Delta\delta$  EL\_PhyR and  $\Delta\delta$  EL\_PhyR<sub>control</sub> (black and blue lines), with  $\Delta\delta$  EL\_PhyR closer to 0 provides further support our validation. Residue regions with higher chemical shift deviations between predicted and experimental chemical shifts (*e.g.* 40-50, 90-100) correspond to flexible loop regions that adopt different conformations as observed in the NMR structure of isolated ECFSL complexed with anti- $\sigma$  (Campagne et al., 2012) and crystal structure of full-length PhyR (Herrou et al., 2010).

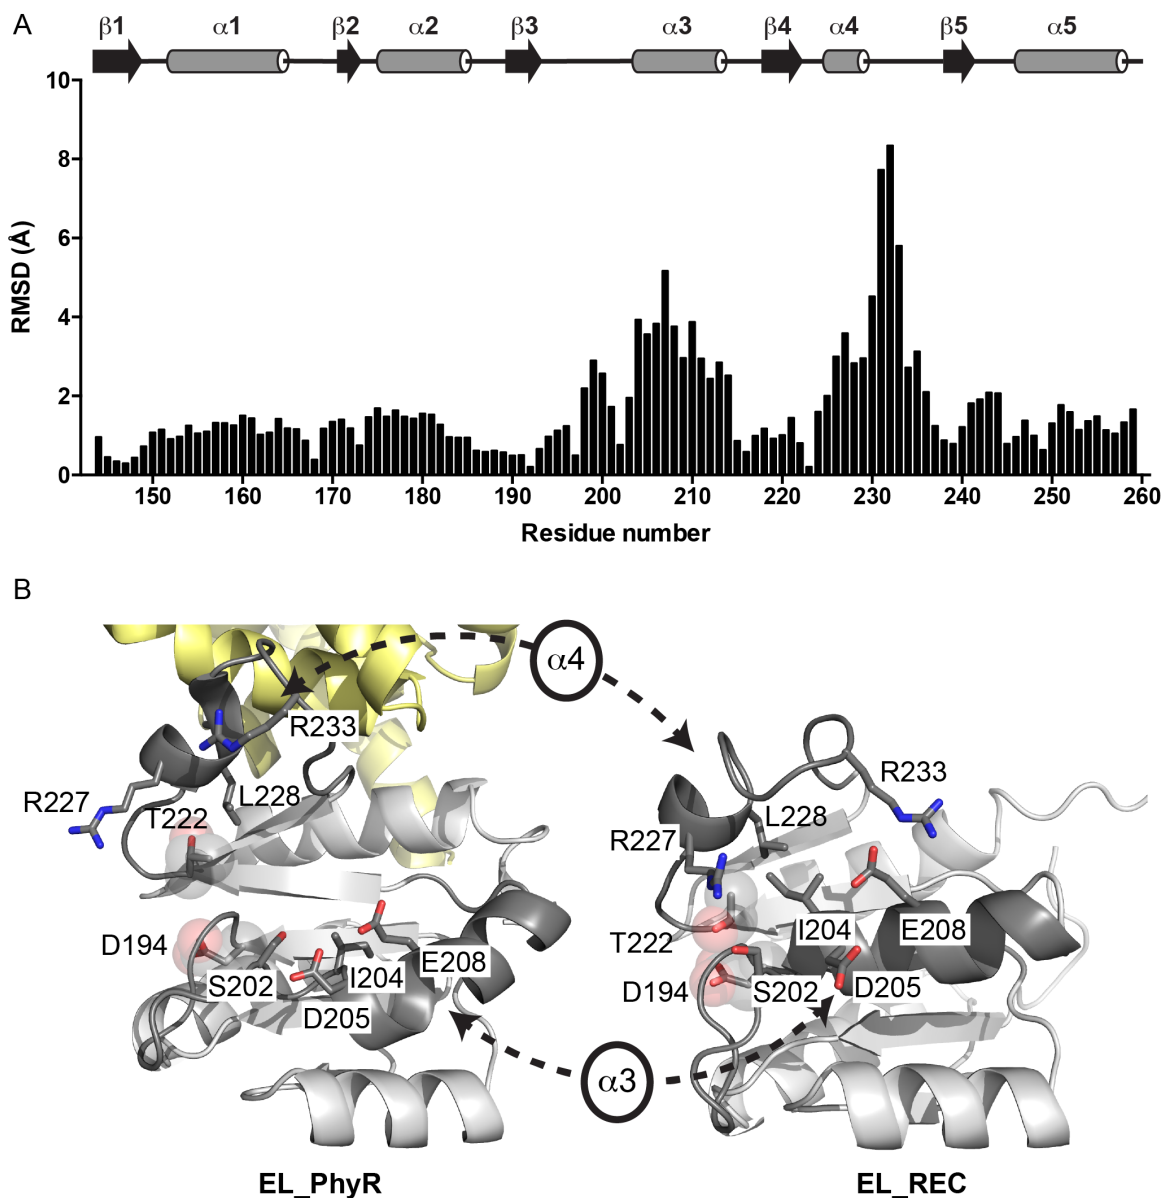

**Figure S6. Related to Figures 4, 6 and 7.**

Removal of the EL\_PhyR ECFSL output domain substantially changes the  $\alpha 3$ - $\alpha 4$ - $\beta 5$  REC surface used for interdomain contact. (A) Comparison of backbone atom positions (N, CA, C, O) in the EL\_PhyR homology model and EL\_REC NMR structure were conducted by RMSD calculations. These demonstrate that largest changes are localized in the  $\alpha 4$ - $\beta 5$  loop region, which directly contacts with the output domain in the full-length structure. Other regions with elevated RMSD values include the  $\alpha 3$  helix, immediately adjacent to  $\alpha 4$ . Fitting was performed using the program ProFit (<http://www.bioinf.org.uk/software/profit>) based on (McLachlan, 1982). (B) The structural conformation of helices  $\alpha 3$  and  $\alpha 4$  in EL\_REC are stabilized by a series of electrostatic (S202-R227, D205 and E208 with R233) and van-der-Waals (I204-L228) interactions.

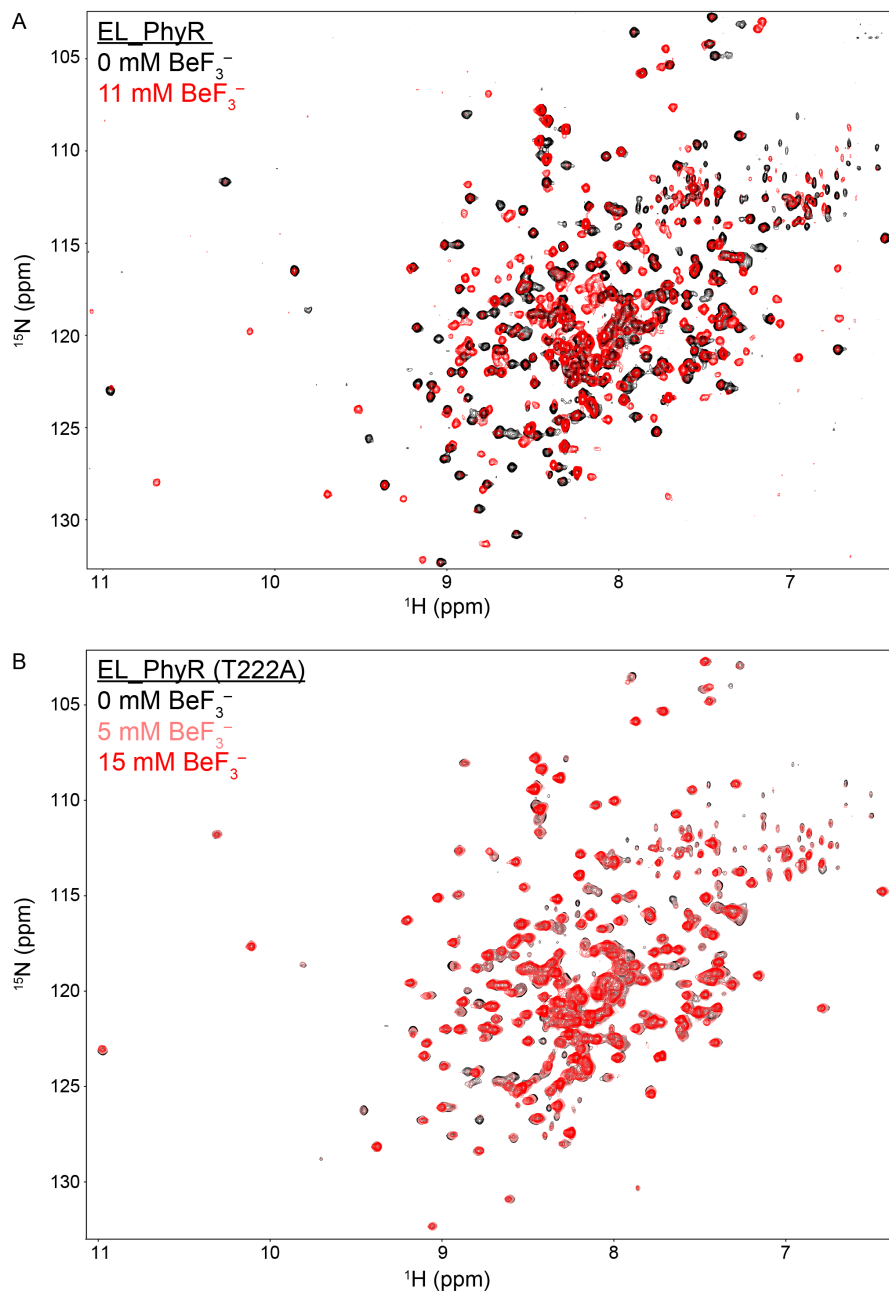

**Figure S7. Related to Figures 2, 3, 5 and 7.**

Threonine 222 plays an important role in PhyR activation. (A) <sup>15</sup>N-<sup>1</sup>H HSQC spectra overlap of EL\_PhyR in the presence and absence of BeF<sub>3</sub><sup>-</sup> shows extensive differences, indicating that BeF<sub>3</sub><sup>-</sup> binding leads to marked changes on protein conformation. *Note that this panel is a duplicate of Figure S3A, reprinted here to facilitate comparisons with the EL\_PhyR (T222A) data presented below.* (B) In contrast, BeF<sub>3</sub><sup>-</sup> titrations of the EL\_PhyR (T222A) mutant show that the removal of interactions between Thr and nearby active site residues affected protein activation as indicated by the reduced spectral changes in contrast to wild-type (Panel A) with the addition of BeF<sub>3</sub><sup>-</sup> up to 15 mM. Buffer conditions: 20 mM HEPES (pH 7), 50 mM NaCl, 5 mM MgCl<sub>2</sub>.



## Supplemental Experimental Procedures

### Protein expression and purification

To express proteins in rich media, *Escherichia coli* BL21(DE3) cells were transformed with expression vectors and grown at 37 °C in LB media containing 100 µg/mL of ampicillin to an  $A_{600}$  of 0.8, then induced overnight at 18 °C by addition of 0.4 mM isopropyl β-D-thiogalactoside. Cells were harvested, resuspended into buffer with 50 mM Tris (pH 8), 100 mM NaCl.

To purify proteins, cells containing natural abundance or isotopically labeled ( $U\text{-}^{15}\text{N}$ ,  $U\text{-}^{15}\text{N}/^{13}\text{C}$ ,  $U\text{-}^2\text{H}/^{15}\text{N}/^{13}\text{C}$ ) protein were lysed by extrusion, and centrifuged at 48,000 g for 45 min. The supernatant fraction was initially loaded onto a  $\text{Ni}^{2+}$  affinity column (Chelating Sepharose Fast Flow, GE Healthcare) pre-equilibrated with Tris (pH 8) and 100 mM NaCl plus 25 mM imidazole. Proteins were eluted using a 25 to 500 mM imidazole gradient and then digested with HIS6-TEV protease (Blommel and Fox, 2007). Cleaved target proteins were separated from their tags and TEV protease using a  $\text{Ni}^{2+}$  affinity column; flowthroughs were collected and concentrated (Amicon Ultra, Millipore). A final gel filtration step used HiLoad 16/60 Superdex 75, with column pre-equilibrated in 50 mM Tris at pH 8 and 100 mM NaCl buffer. All proteins were analyzed by SDS-PAGE and stored at 4 °C.

### Phosphorylation assays

Samples of EL\_PhyR (50 µM, either wild-type or T222A) were incubated with 5 µM of the EL368 histidine kinase (Correa et al., 2013) in 50 mM Tris (pH 8), 100 mM NaCl, 5 mM  $\text{MgCl}_2$ , 1 mM ATP and 12 µCi [ $\gamma\text{-}^{32}\text{P}$ ] ATP (6000 Ci/mmol, Perkin Elmer) at room temperature. Aliquots were removed at intervals of 30, 45, 60, 75, 90, 120 and 150 s, then quenched into 4 x SDS-PAGE sample buffer (50 mM Tris (pH 6.8), 200 mM NaCl, 40 mM EDTA, 0.2% bromophenol blue, 10% (v/v) β-mercaptoethanol, 4% (w/v) SDS, and 20% (v/v) glycerol). After electrophoresis, the dye front and unincorporated ATP were removed with a razor blade. Subsequently, gels were dried under vacuum at 80 °C for 45 min and exposed for 30 to 60 min to a phosphorimager screen that was later scanned with a Fujifilm FLA-5100.

## Supplemental References

Blommel, P.G., and Fox, B.G. (2007). A combined approach to improving large-scale production of tobacco etch virus protease. *Protein Expr Purif* 55, 53-68.

Campagne, S., Damberger, F.F., Kaczmarczyk, A., Francez-Charlot, A., Allain, F.H., and Vorholt, J.A. (2012). Structural basis for sigma factor mimicry in the general stress response of Alphaproteobacteria. *Proc Natl Acad Sci U S A* 109, E1405-1414.

Corpet, F. (1988). Multiple sequence alignment with hierarchical clustering. *Nucleic Acids Res* 16, 10881-10890.

Correa, F., Ko, W.H., Ocasio, V., Bogomolni, R.A., and Gardner, K.H. (2013). Blue Light Regulated Two-Component Systems: Enzymatic and Functional Analyses of Light-Oxygen-Voltage (LOV)-Histidine Kinases and Downstream Response Regulators. *Biochemistry* 52, 4656-4666.

Han, B., Liu, Y., Ginzinger, S.W., and Wishart, D.S. (2011). SHIFTX2: significantly improved protein chemical shift prediction. *J Biomol NMR* 50, 43-57.

Herrou, J., Foreman, R., Fiebig, A., and Crosson, S. (2010). A structural model of anti-anti-sigma inhibition by a two-component receiver domain: the PhyR stress response regulator. *Mol Microbiol* 78, 290-304.

McLachlan, A.D. (1982). Rapid comparison of protein structures. *Acta Cryst* A38, 871-873.
